# Scaling Up Diarrhea Prevention and Treatment Interventions: A Lives Saved Tool Analysis

Christa L. Fischer Walker<sup>1\*</sup>, Ingrid K. Friberg<sup>1</sup>, Nancy Binkin<sup>2</sup>, Mark Young<sup>2</sup>, Neff Walker<sup>1</sup>, Olivier Fontaine<sup>3</sup>, Eva Weissman<sup>4</sup>, Akanksha Gupta<sup>2</sup>, Robert E. Black<sup>1</sup>

**1** Johns Hopkins University Bloomberg School of Public Health, Department of International Health, Baltimore, Maryland, United States of America, **2** Health Section, Programme Division, United Nations Children's Fund (UNICEF), New York, New York, United States of America, **3** World Health Organization (WHO), Department of Child and Adolescent Health, Geneva, Switzerland, **4** Futures Institute, Glastonbury, Connecticut, United States of America

## Abstract

**Background:** Diarrhea remains a leading cause of mortality among young children in low- and middle-income countries. Although the evidence for individual diarrhea prevention and treatment interventions is solid, the effect a comprehensive scale-up effort would have on diarrhea mortality has not been estimated.

**Methods and Findings:** We use the Lives Saved Tool (*LiST*) to estimate the potential lives saved if two scale-up scenarios for key diarrhea interventions (oral rehydration salts [ORS], zinc, antibiotics for dysentery, rotavirus vaccine, vitamin A supplementation, basic water, sanitation, hygiene, and breastfeeding) were implemented in the 68 high child mortality countries. We also conduct a simple costing exercise to estimate cost per capita and total costs for each scale-up scenario. Under the ambitious (feasible improvement in coverage of all interventions) and universal (assumes near 100% coverage of all interventions) scale-up scenarios, we demonstrate that diarrhea mortality can be reduced by 78% and 92%, respectively. With universal coverage nearly 5 million diarrheal deaths could be averted during the 5-year scale-up period for an additional cost of US\$12.5 billion invested across 68 priority countries for individual-level prevention and treatment interventions, and an additional US\$84.8 billion would be required for the addition of all water and sanitation interventions.

**Conclusion:** Using currently available interventions, we demonstrate that with improved coverage, diarrheal deaths can be drastically reduced. If delivery strategy bottlenecks can be overcome and the international community can collectively deliver on the key strategies outlined in these scenarios, we will be one step closer to achieving success for the United Nations' Millennium Development Goal 4 (MDG4) by 2015.

Please see later in the article for the Editors' Summary.

**Citation:** Fischer Walker CL, Friberg IK, Binkin N, Young M, Walker N, et al. (2011) Scaling Up Diarrhea Prevention and Treatment Interventions: A Lives Saved Tool Analysis. *PLoS Med* 8(3): e1000428. doi:10.1371/journal.pmed.1000428

**Academic Editor:** David Osrin, Institute of Child Health, United Kingdom

**Received** May 17, 2010; **Accepted** February 10, 2011; **Published** March 22, 2011

**Copyright:** © 2011 Fischer Walker et al. This is an open-access article distributed under the terms of the Creative Commons Attribution License, which permits unrestricted use, distribution, and reproduction in any medium, provided the original author and source are credited.

**Funding:** This work was supported in part by a grant to the US Fund for UNICEF from the Bill & Melinda Gates Foundation (grant 43386) for the Child Health Epidemiology Reference Group to "Promote evidence-based decision making in designing maternal, neonatal and child health interventions in low- and middle-income countries." The funders had no role in the study design, data collection, analysis, decision to publish or preparation of the manuscript.

**Competing Interests:** The authors have declared that no competing interests exist.

**Abbreviations:** JMP, Joint Monitoring Program; *LiST*, Lives Saved Tool; ORS, oral rehydration salts; WASH, water, sanitation, and hygiene

\* E-mail: cfischer@jhsph.edu

## Introduction

Diarrhea remains a leading cause of morbidity and mortality among children under 5 y of age in low- and middle-income countries [1]. Diarrhea mortality has declined from an estimated 4.5 million deaths in the early 1980s to 1.3 million in 2008 with the advent of oral rehydration salts (ORS), the implementation of routine vitamin A supplementation and measles vaccine, improved sanitation, access to clean water, and hand washing, which are major risk factors for diarrhea incidence in many parts of the world [1,2]. Given the availability of cost-effective prevention and treatment interventions, however, the number of deaths owing to diarrhea remains unacceptably high. Further reduction of diarrhea mortality is critical if the fourth United Nations' Millennium Development Goal (MDG4)—reduction of child mortality by two-thirds of the 1990 level (12.4 million deaths per year)—is to be achieved by 2015.

In 2009, UNICEF and WHO published a report on diarrhea that included a package of key diarrhea prevention and treatment interventions to reduce diarrhea morbidity and mortality. The complete package includes improving access to safe water, community-wide promotion of sanitation, routine rotavirus and measles immunization, vitamin A supplementation and promotion of breastfeeding, and treatment with ORS and zinc [3]. Although the full package of prevention and treatment interventions is based on solid evidence supporting individual interventions, the effect that a universal scale-up effort would have on diarrhea mortality has not been estimated.

The Lives Saved Tool (*LiST*) is designed to enable international agencies and country planners to estimate the effect of increasing coverage of selected intervention combinations, such as the UNICEF/WHO recommended interventions for diarrhea, on mortality. *LiST* utilizes country-specific cause of death profiles and the effect of selected interventions on cause-specific mortality, and thus generates country-specific estimates of mortality reductions [4].

Here, we present two scenarios for the scale-up of diarrhea prevention and treatment interventions from 2010 to 2015. We use *LiST* to estimate the potential lives saved if each scale-up scenario were implemented in the 68 “Countdown to 2015” countries. These 68 countries were prioritized by UNICEF and partners on the basis of high child mortality rates; together they represent more than 95% of child deaths [5]. These data are critical for program planners, funders, and policy and decision makers to better understand the potential impact on mortality when investing in diarrhea prevention and treatment at the country level.

## Methods

*LiST* is a child survival modeling tool that uses country level under-5 mortality rates and cause of death profiles, and models the effects of changes in coverage of interventions on overall and cause-specific mortality rates for children under 5 y of age (<http://www.jhsph.edu/dept/ih/IIP/list/spectrum.html>) [4,6]. It is built into the Spectrum policy modeling system, which includes a demographic platform based on UN population data, HIV, and family planning inputs. As a public access tool, analyses such as these can be performed, repeated, or altered by researchers or program and policy leaders alike. The effectiveness of each of the diarrhea interventions incorporated into the *LiST* tool has been recently reviewed by the Child Health Epidemiology Reference Group (CHERG) [7–11] and as part of a universal and published review [12,13]. The CHERG reviews go beyond previously

published systematic reviews and meta-analyses, utilizing all available data to provide the best estimate for the effect of each intervention on diarrhea-specific mortality [6]. In previous exercises, the *LiST* tool has estimated mortality reductions due to coverage changes that have matched well to the measured changes in mortality [14,15].

## Establishing Baseline Values for Cause of Death and Coverage of Interventions

For this exercise, we generated *LiST* models for each of the 68 priority countries to project potential reductions in diarrhea mortality [5]. We used standard country-level child mortality rates as published by the Interagency Group for Child Mortality Estimation and the cause of death profiles published by the CHERG [16,17]. We used baseline intervention coverage values for improved water supply, household connection, and improved sanitation from a special analysis of WHO/UNICEF Joint Monitoring Programme for Water Supply and Sanitation (JMP) data [18]. For these interventions we assumed no change in coverage between most recent available data points (typically 2008) and 2010. Vaccination and vitamin A coverage levels were based on WHO/UNICEF immunization program data [19]. All other baseline intervention coverage data were based on the most recent Demographic Health Survey (DHS), Multiple Indicator Cluster Survey (MICS), or Malaria Indicator Survey (MIS). Coverage data were not available for selected indicators in Papua New Guinea and Democratic People's Republic of Korea; for the former, we used estimated average regional data for Southeast Asia for ORS and antibiotic use, and for the latter, estimated data from China were used for breastfeeding and antibiotic use (see Table S1 for values).

Ten interventions proven to reduce diarrheal mortality were modeled. The preventive interventions were breastfeeding, vitamin A supplementation, hand washing with soap, improved sanitation (which encompasses toilet facilities and disposal of waste), improved drinking-water source, treatment of water in the home, and rotavirus vaccination. The treatment interventions included were ORS and zinc as well as antibiotics for dysentery. To model “treatment of water in the home,” we assumed a value of 0.21 for the effect of this indicator on diarrhea incidence and mortality [20]. Current coverage of this indicator is not available for all countries and it would be inappropriate to assume that 100% of households currently need clean water. We used the percent of children living in households with piped water as a proxy for current coverage of a clean water supply, available for all countries from the JMP [18]. This is likely to generate a conservative estimate of the potential impact of treatment of water, as it is probable that some households with piped water also need treatment. We included antibiotics for dysentery, though this was not included in the recent UNICEF/WHO recommended package, because it remains an important tool for treating dysenteric diarrhea. Lastly, measles vaccination, which is included in the UNICEF/WHO recommended package, was not included because measles-related diarrheal deaths are attributed to measles directly. Baseline values are presented in Table 1 for all interventions except breastfeeding. Additional details with regard to assumptions about breastfeeding coverage can be found in Table S1.

## Modeling Increased Coverage of Interventions

Within the model, all chosen interventions have a direct impact on diarrheal mortality reduction. Four of the seven interventions—improved water source, treatment of water in the home,

**Table 1.** Baseline coverage values for all interventions except breastfeeding.

| Country                               | Percentage of Children <5 y with Access to/Practicing |                            |                                  |                           | Percentage of Children with Diarrhea in Last 2 wk Who Were Treated |                                        |                                          | Percentage of Children Who Received |                                        |
|---------------------------------------|-------------------------------------------------------|----------------------------|----------------------------------|---------------------------|--------------------------------------------------------------------|----------------------------------------|------------------------------------------|-------------------------------------|----------------------------------------|
|                                       | Improved Water <sup>a</sup>                           | Treated Water <sup>b</sup> | Improved Sanitation <sup>a</sup> | Hand-Washing <sup>c</sup> | ORS <sup>d</sup>                                                   | Antibiotics for Dysentery <sup>e</sup> | Zinc for Diarrhea Treatment <sup>f</sup> | Rotavirus Vaccination <sup>g</sup>  | Vitamin A Supplementation <sup>h</sup> |
| Afghanistan                           | 48                                                    | 4                          | 37                               | 17                        | 30                                                                 | 16                                     | 0                                        | 0                                   | 96                                     |
| Angola                                | 50                                                    | 20                         | 57                               | 17                        | 40                                                                 | 20                                     | 0                                        | 0                                   | 82                                     |
| Azerbaijan                            | 80                                                    | 50                         | 45                               | 17                        | 10                                                                 | 5                                      | 0                                        | 0                                   | 90                                     |
| Bangladesh                            | 80                                                    | 6                          | 51                               | 17                        | 77                                                                 | 22                                     | 23                                       | 0                                   | 97                                     |
| Benin                                 | 75                                                    | 12                         | 12                               | 17                        | 23                                                                 | 12                                     | 0                                        | 0                                   | 52                                     |
| Bolivia                               | 86                                                    | 77                         | 25                               | 17                        | 29                                                                 | 31                                     | 0                                        | 0                                   | 45                                     |
| Botswana                              | 95                                                    | 62                         | 60                               | 17                        | 49                                                                 | 24                                     | 0                                        | 0                                   | 15                                     |
| Brazil                                | 97                                                    | 91                         | 80                               | 17                        | 56                                                                 | 25                                     | 0                                        | 71                                  | 0                                      |
| Burkina Faso                          | 76                                                    | 4                          | 11                               | 17                        | 17                                                                 | 31                                     | 0                                        | 0                                   | 100                                    |
| Burundi                               | 72                                                    | 6                          | 46                               | 17                        | 38                                                                 | 26                                     | 0                                        | 0                                   | 80                                     |
| Cambodia                              | 61                                                    | 16                         | 29                               | 17                        | 21                                                                 | 12                                     | 0                                        | 0                                   | 88                                     |
| Cameroon                              | 74                                                    | 15                         | 47                               | 17                        | 13                                                                 | 38                                     | 0                                        | 0                                   | 92                                     |
| CAR                                   | 67                                                    | 2                          | 34                               | 17                        | 17                                                                 | 39                                     | 0                                        | 0                                   | 68                                     |
| Chad                                  | 50                                                    | 5                          | 9                                | 17                        | 15                                                                 | 12                                     | 0                                        | 0                                   | 0                                      |
| China                                 | 89                                                    | 83                         | 55                               | 13                        | 29                                                                 | 33                                     | 0                                        | 0                                   | 0                                      |
| Congo                                 | 71                                                    | 28                         | 30                               | 17                        | 18                                                                 | 22                                     | 0                                        | 0                                   | 10                                     |
| Cote d'Ivoire                         | 80                                                    | 40                         | 23                               | 17                        | 14                                                                 | 19                                     | 0                                        | 0                                   | 90                                     |
| Djibouti                              | 92                                                    | 72                         | 56                               | 17                        | 49                                                                 | 43                                     | 0                                        | 0                                   | 86                                     |
| Democratic People's Republic of Korea | 100                                                   | 77                         | 59                               | 17                        | 35                                                                 | 33                                     | 0                                        | 0                                   | 85                                     |
| Democratic Republic of the Congo      | 46                                                    | 9                          | 23                               | 17                        | 31                                                                 | 21                                     | 0                                        | 0                                   | 98                                     |
| Egypt                                 | 99                                                    | 92                         | 94                               | 17                        | 34                                                                 | 73                                     | 1                                        | 0                                   | 68                                     |
| Equatorial Guinea                     | 43                                                    | 6                          | 51                               | 17                        | 36                                                                 | 18                                     | 0                                        | 0                                   | 0                                      |
| Eritrea                               | 61                                                    | 9                          | 14                               | 17                        | 45                                                                 | 22                                     | 0                                        | 0                                   | 49                                     |
| Ethiopia                              | 38                                                    | 7                          | 12                               | 17                        | 20                                                                 | 5                                      | 0                                        | 0                                   | 88                                     |
| Gabon                                 | 87                                                    | 43                         | 33                               | 17                        | 25                                                                 | 24                                     | 0                                        | 0                                   | 0                                      |
| Gambia                                | 92                                                    | 33                         | 67                               | 17                        | 41                                                                 | 61                                     | 0                                        | 0                                   | 28                                     |
| Ghana                                 | 82                                                    | 17                         | 13                               | 3                         | 45                                                                 | 33                                     | 0                                        | 0                                   | 24                                     |
| Guatemala                             | 94                                                    | 81                         | 81                               | 17                        | 30                                                                 | 15                                     | 0                                        | 0                                   | 20                                     |
| Guinea                                | 71                                                    | 10                         | 19                               | 17                        | 33                                                                 | 17                                     | 0                                        | 0                                   | 94                                     |
| Guinea-Bissau                         | 61                                                    | 9                          | 21                               | 17                        | 26                                                                 | 42                                     | 0                                        | 0                                   | 66                                     |
| Haiti                                 | 63                                                    | 12                         | 17                               | 17                        | 40                                                                 | 5                                      | 0                                        | 0                                   | 34                                     |
| India                                 | 88                                                    | 22                         | 31                               | 42                        | 26                                                                 | 13                                     | 0                                        | 0                                   | 53                                     |
| Indonesia                             | 80                                                    | 23                         | 52                               | 17                        | 35                                                                 | 33                                     | 0                                        | 0                                   | 86                                     |
| Iraq                                  | 79                                                    | 76                         | 73                               | 17                        | 31                                                                 | 82                                     | 0                                        | 0                                   | 0                                      |
| Kenya                                 | 59                                                    | 19                         | 31                               | 17                        | 29                                                                 | 22                                     | 0                                        | 0                                   | 27                                     |
| Laos                                  | 57                                                    | 20                         | 53                               | 17                        | 31                                                                 | 52                                     | 0                                        | 0                                   | 69                                     |
| Lesotho                               | 85                                                    | 19                         | 12                               | 17                        | 42                                                                 | 27                                     | 0                                        | 0                                   | 38                                     |
| Liberia                               | 68                                                    | 2                          | 17                               | 17                        | 53                                                                 | 49                                     | 0                                        | 0                                   | 85                                     |
| Madagascar                            | 41                                                    | 7                          | 11                               | 4                         | 12                                                                 | 20                                     | 0                                        | 0                                   | 97                                     |
| Malawi                                | 80                                                    | 7                          | 56                               | 17                        | 63                                                                 | 30                                     | 0                                        | 0                                   | 95                                     |
| Mali                                  | 56                                                    | 12                         | 36                               | 17                        | 14                                                                 | 7                                      | 0                                        | 0                                   | 97                                     |
| Mauritania                            | 49                                                    | 22                         | 26                               | 17                        | 22                                                                 | 24                                     | 0                                        | 0                                   | 87                                     |

Table 1. Cont.

| Country          | Percentage of Children <5 y with Access to/Practicing |                            |                                  |                           | Percentage of Children with Diarrhea in Last 2 wk Who Were Treated |                                        |                                          | Percentage of Children Who Received |                                        |
|------------------|-------------------------------------------------------|----------------------------|----------------------------------|---------------------------|--------------------------------------------------------------------|----------------------------------------|------------------------------------------|-------------------------------------|----------------------------------------|
|                  | Improved Water <sup>a</sup>                           | Treated Water <sup>b</sup> | Improved Sanitation <sup>a</sup> | Hand-Washing <sup>c</sup> | ORS <sup>d</sup>                                                   | Antibiotics for Dysentery <sup>e</sup> | Zinc for Diarrhea Treatment <sup>f</sup> | Rotavirus Vaccination <sup>g</sup>  | Vitamin A Supplementation <sup>h</sup> |
| Mexico           | 94                                                    | 87                         | 85                               | 17                        | 4                                                                  | 15                                     | 0                                        | 0                                   | 63                                     |
| Morocco          | 81                                                    | 58                         | 69                               | 17                        | 23                                                                 | 17                                     | 0                                        | 0                                   | 43                                     |
| Mozambique       | 47                                                    | 8                          | 17                               | 17                        | 49                                                                 | 15                                     | 0                                        | 0                                   | 83                                     |
| Myanmar          | 71                                                    | 6                          | 81                               | 17                        | 45                                                                 | 18                                     | 0                                        | 0                                   | 94                                     |
| Nepal            | 92                                                    | 19                         | 32                               | 17                        | 29                                                                 | 25                                     | 0                                        | 0                                   | 93                                     |
| Niger            | 48                                                    | 7                          | 9                                | 17                        | 18                                                                 | 9                                      | 0                                        | 0                                   | 92                                     |
| Nigeria          | 58                                                    | 6                          | 32                               | 17                        | 18                                                                 | 46                                     | 0                                        | 0                                   | 74                                     |
| Pakistan         | 90                                                    | 33                         | 45                               | 17                        | 41                                                                 | 50                                     | 0                                        | 0                                   | 97                                     |
| Peru             | 82                                                    | 70                         | 68                               | 14                        | 28                                                                 | 28                                     | 0                                        | 0                                   | 0                                      |
| Philippines      | 91                                                    | 48                         | 76                               | 17                        | 42                                                                 | 36                                     | 0                                        | 0                                   | 86                                     |
| Papua New Guinea | 40                                                    | 10                         | 45                               | 17                        | 30                                                                 | 30                                     | 0                                        | 0                                   | 7                                      |
| Rwanda           | 65                                                    | 4                          | 54                               | 17                        | 21                                                                 | 13                                     | 0                                        | 0                                   | 76                                     |
| Senegal          | 69                                                    | 38                         | 51                               | 23                        | 15                                                                 | 20                                     | 0                                        | 0                                   | 90                                     |
| Sierra Leone     | 49                                                    | 6                          | 13                               | 17                        | 52                                                                 | 45                                     | 0                                        | 0                                   | 12                                     |
| Somalia          | 30                                                    | 19                         | 23                               | 17                        | 9                                                                  | 32                                     | 0                                        | 0                                   | 100                                    |
| South Africa     | 91                                                    | 67                         | 77                               | 17                        | 40                                                                 | 32                                     | 0                                        | 0                                   | 39                                     |
| Sudan            | 57                                                    | 28                         | 34                               | 17                        | 58                                                                 | 45                                     | 0                                        | 0                                   | 67                                     |
| Swaziland        | 69                                                    | 32                         | 55                               | 17                        | 86                                                                 | 24                                     | 0                                        | 0                                   | 44                                     |
| Tajikistan       | 70                                                    | 40                         | 94                               | 17                        | 48                                                                 | 41                                     | 0                                        | 0                                   | na                                     |
| Tanzania         | 54                                                    | 8                          | 24                               | 13                        | 54                                                                 | 22                                     | 0                                        | 0                                   | 93                                     |
| Togo             | 60                                                    | 6                          | 12                               | 17                        | 11                                                                 | 26                                     | 0                                        | 0                                   | 64                                     |
| Turkmenistan     | 71                                                    | 45                         | 95                               | 17                        | 47                                                                 | 50                                     | 0                                        | 0                                   | 0                                      |
| Uganda           | 64                                                    | 3                          | 47                               | 14                        | 40                                                                 | 47                                     | 0                                        | 0                                   | 67                                     |
| Yemen            | 62                                                    | 28                         | 52                               | 17                        | 33                                                                 | 38                                     | 0                                        | 0                                   | 47                                     |
| Zambia           | 60                                                    | 14                         | 49                               | 17                        | 60                                                                 | 14                                     | 0                                        | 0                                   | 96                                     |
| Zimbabwe         | 82                                                    | 36                         | 44                               | 17                        | 6                                                                  | 8                                      | 0                                        | 0                                   | 20                                     |

<sup>a</sup>Data from JMP 2010.

<sup>b</sup>Used piped water values from the JMP 2010 report.

<sup>c</sup>Estimates based on work Curtis et al. [31].

<sup>d</sup>Most recent Demographic Health Survey (DHS)/Multiple Indicator Cluster Survey (MICS). Defined as percent of children with diarrhea in the past 2 wk who were treated with ORS or prepackaged ORS solutions.

<sup>e</sup>Most recent DHS/MICS. Assumed to be the same as percent of children with symptoms suggestive of pneumonia treated with an antibiotic.

<sup>f</sup>Most recent DHS/MICS. Defined as percent of children with diarrhea in the past 2 wk treated with zinc. If these data were not collected in the survey, 0 was the default value.

<sup>g</sup>Estimates from WHO/UNICEF estimates of national immunization coverage [32].

<sup>h</sup>UNICEF 2008 value or most recent. Countries listed as na are considered not to be Vitamin A deficient according to the Lancet Nutrition series and were excluded from the analysis.

doi:10.1371/journal.pmed.1000428.t001

hand washing with soap, and improved sanitation—also have an indirect impact on multiple causes of mortality via a reduction in the rate of stunting. *LiST* applies the documented effectiveness for each intervention to the total diarrheal deaths possible among children under 5 for each given year. For each intervention the effectiveness value is applied to the residual number of diarrheal deaths available to “save” for that year thus eliminating the potential to double count lives saved.

The scale-up scenarios presented here assume a linear increase in coverage from the baseline coverage year, 2010 (using the most recent data available) through the year 2015; this allowed us to generate the total number of diarrheal deaths, by country for each

year between 2010 and 2015. For an estimate of baseline diarrheal deaths we applied the 2008 overall mortality rate and the cause of death structure to the 2010 population.

We applied two different scale-up scenarios of the seven diarrhea prevention and three treatment interventions, representing ambitious but feasible coverage objectives and a universal coverage plan. The first or “ambitious” scenario represents what is felt to be an essential and realizable scale-up strategy as countries strive to reduce under-five mortality in the context of achievement of MDG4, whereas the second or “universal” scenario represents maximum levels that could be achieved through an aggressive, highly concerted, and better-funded

initiative. Table 2 shows the coverage levels used in the analysis, representing the ambitious and universal scale-up scenarios. For breastfeeding, coverage estimates vary by age group (<1 mo, 1–5 mo, 6–11 mo, 12–23 mo) and degree of exclusivity (exclusive, predominant, partial, none). For any country that has already attained the modeled level of coverage for a specific intervention, we assumed maintenance of the achieved coverage rate. Additional details on individual country calculations can be found in Table S1.

### Estimating the Cost of Scale-up

We conducted a cost analysis for the specified interventions in both scale-up scenarios using an ingredients-based approach. For preventive interventions the population in need was defined as the number of children under 5 (vitamin A, rotavirus vaccine, breastfeeding) or, for the water, sanitation, and hygiene (WASH) interventions, the households with children under 5 y. For

the treatment interventions we assumed that all cases would receive ORS and zinc; we also estimated the proportion of episodes that would meet the clinical definition of dysentery and require antibiotic treatment. Drug, supply and personnel time requirements per average case were calculated based on WHO treatment guidelines and expert opinion, and then costed using UNICEF's supply catalogue [21] and WHO CHOICE's country-specific database of medical staff salaries [22]. We also included costs of outreach activities and communication strategies. For non-WASH interventions, the analysis looked only at direct costs of providing the interventions; costs associated with capital investments such as building new health centers and training facilities are not captured in this analysis. We calculated the costs for the continuation of baseline coverage rates and the scale-up of both scenarios for all 68 countries included in this model. We then calculated the total per capita (total population) cost as well as the additional per capita cost

**Table 2.** Modeled target coverage rates by intervention for two scale-up plans for the 68 priority countries.

| Intervention <sup>a</sup>                                                                     | LIST Estimates of Effectiveness of Diarrheal Deaths Averted | Percent National Target Coverage among Children <5 y of Age by 2015 |                    |
|-----------------------------------------------------------------------------------------------|-------------------------------------------------------------|---------------------------------------------------------------------|--------------------|
|                                                                                               |                                                             | Ambitious Coverage                                                  | Universal Coverage |
| <b>ORS for treatment of all episodes</b>                                                      | 93% <sup>b</sup>                                            | 75                                                                  | 90                 |
| <b>Zinc (10–14 d of supplementation) for treatment of all episodes</b>                        | 23%                                                         | 50                                                                  | 90                 |
| <b>Antibiotics for dysentery episodes</b>                                                     | 99% <sup>c</sup>                                            | 75                                                                  | 90                 |
| <b>Rotavirus vaccine</b>                                                                      | 74% <sup>d</sup>                                            | 50                                                                  | 90                 |
| <b>Routine vitamin A supplementation for children 6–59 mo (twice yearly)</b>                  | 32%                                                         | 90                                                                  | 90                 |
| <b>Hand-washing with soap</b>                                                                 | 48%                                                         | 35                                                                  | 55                 |
| <b>Improved sanitation (primarily toilet construction)</b>                                    | 69%                                                         | 67                                                                  | 75                 |
| <b>Access to safe water (improving water quality at source and safe storage in home) [18]</b> | 17%                                                         | —                                                                   | 99                 |
| Africa                                                                                        | —                                                           | 75                                                                  | —                  |
| Asia                                                                                          | —                                                           | 86                                                                  | —                  |
| <b>Home purification of water</b>                                                             | 21%                                                         | 30                                                                  | 70                 |
| <b>Breastfeeding: RR of diarrhea mortality</b>                                                |                                                             |                                                                     |                    |
| Exclusive breastfeeding (no additional fluids or foods)                                       |                                                             |                                                                     |                    |
| 0–5 mo                                                                                        | 1.0                                                         | 70                                                                  | 90                 |
| 6–23 mo                                                                                       | 1.0                                                         | —                                                                   | —                  |
| Predominant breastfeeding (breastfeeding with only additional water and water based fluids)   |                                                             |                                                                     |                    |
| 0–5 mo                                                                                        | 2.28                                                        | 10                                                                  | 5                  |
| 6–23 mo                                                                                       | 1.0                                                         | 0                                                                   | 0                  |
| Partial breastfeeding (breastfeeding with additional fluids and/or foods)                     |                                                             |                                                                     |                    |
| 0–5 mo                                                                                        | 4.62                                                        | 10                                                                  | 0                  |
| 6–11 mo                                                                                       | —                                                           | 90                                                                  | 95                 |
| 6–23 mo                                                                                       | 1.0                                                         | —                                                                   | —                  |
| 12–23 mo                                                                                      | —                                                           | 75                                                                  | 85                 |
| No breastfeeding                                                                              |                                                             |                                                                     |                    |
| 0–5 mo                                                                                        | 10.53                                                       | —                                                                   | —                  |
| 6–23 mo                                                                                       | 2.28                                                        | —                                                                   | —                  |

<sup>a</sup>All interventions are applied to the 1–59 mo age group except ORS, which is applied to 0–59 mo and vitamin A, which is applied to 6–59 mo.

<sup>b</sup>Applied to nondysentery diarrheal deaths assumed to be 95% of total diarrheal deaths.

<sup>c</sup>Applied to dysentery diarrheal deaths assumed to be 5% of total diarrheal deaths.

<sup>d</sup>Applied to rotavirus deaths assumed to be 39% of total diarrheal deaths.

RR, relative risk.

doi:10.1371/journal.pmed.1000428.t002

to achieve each final coverage target for each year through 2015. Costs for the WASH interventions were kept separate from the individual-level prevention and treatment interventions.

## Results

Figure 1 presents trends in the number of diarrheal deaths between 2010 and 2015 for each of the two scenarios; it also shows the proportion of diarrheal deaths that would occur each year relative to the 2010 baseline values. Under the ambitious scenario, the number of diarrheal deaths would decline from more than 1.39 million a year in the baseline year of 2010 to 334,000 in 2015, which represents a 78% decline and nearly 1 million deaths averted in 2015. Over the 5-y scale-up period, more than 3.8 million deaths would be averted. Assuming linear scale-up, the estimated additional cost to achieve this reduction is US\$0.49 per capita in 2015 for the non-WASH interventions and an additional US\$1.78 per capita if 100% of the cost of the WASH interventions was to be borne by the public health system (Table 3). The total additional cost for scaling up all non-WASH interventions as per the ambitious scenario in these 68 countries over a 5-y period is US\$7.7 billion. If WASH interventions were to be included the costs would rise to US\$49.2 billion.

With the universal coverage scenario, the number of diarrheal deaths would drop to less than 115,000 in 2015, more than a 92% decline from the 2010 levels, representing nearly 1.4 million deaths averted in 2015 (Figures 1 and 2) and more than 4.9 million deaths during the 5-y scale-up period. To achieve these coverage rates, we estimate an additional cost of US\$0.80 per capita in 2015 and an additional US\$3.24 per capita with the addition of all WASH interventions at the highest coverage rates and all costs borne by the health system (Table 2). The total additional cost for scaling up all non-WASH interventions, as per the universal scenario in the

68 countries included in these analyses over a 5-y period, is US\$12.5 billion. If WASH interventions are also included the costs rise to US\$84.8 billion. Under both scenarios, 51% of deaths averted would be in just five countries: India, Nigeria, Democratic Republic of the Congo, Pakistan, and Afghanistan, that is 700,000 and 900,000 deaths in 2015 in the ambitious and universal scale-up scenarios, respectively.

## Discussion

In this exercise we used *LiST* to simulate the potential lives that could be saved by scaling-up ten simple and effective interventions for the prevention and treatment of diarrhea in 68 priority countries. The results of this modeling exercise demonstrate that with currently available technology, diarrheal deaths could be reduced by at least 78% by the end of 2015. To reach MDG4 by 2015, the number of child deaths needs to be reduced by an additional 4.6 million annually from the 2008 estimate of 8.8 million. Reducing diarrheal deaths by more than 1.4 million per year would be a major contribution toward this goal.

By using *LiST* to model the impact of scaling up multiple interventions we are able to illustrate the potential benefits of two scale-up scenarios over a 5-y period. *LiST* is a useful tool for modeling the effect of multiple prevention and treatment interventions because the effect of each intervention is applied step-wise in a cohort model. With this type of model, the effect of a second intervention is only observed on the residual of the first intervention. This ensures that potential lives are not saved more than once thus eliminating the risk of double counting. While coverage for many interventions, such as ORS, is routinely collected in most countries, coverage data for water and sanitation interventions that truly reflect optimal practices are extremely limited and in the case of home purification of water, completely

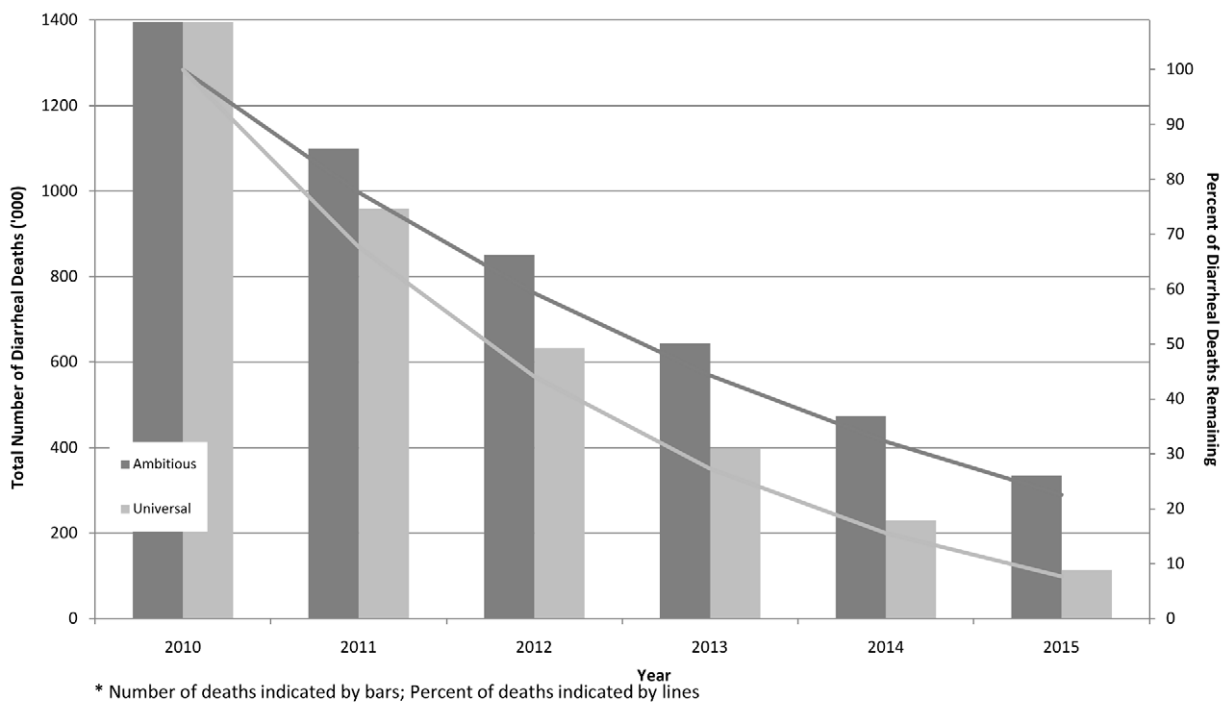

**Figure 1. Trends in number and proportion of diarrheal deaths, under ambitious and universal scale-up plans.**

doi:10.1371/journal.pmed.1000428.g001

**Table 3.** Additional cost per capita to achieve targeted coverage rates for the ambitious and universal scale-up scenarios by 2015.

| Year      | Baseline Cost Per Capita (US\$) <sup>a</sup> | Additional Cost Per Capita (US\$)             |                                       |                                               |                                       |
|-----------|----------------------------------------------|-----------------------------------------------|---------------------------------------|-----------------------------------------------|---------------------------------------|
|           |                                              | Ambitious Scale-Up                            |                                       | Universal Scale-Up                            |                                       |
|           |                                              | All Interventions Excluding WASH <sup>b</sup> | WASH Interventions Alone <sup>c</sup> | All Interventions Excluding WASH <sup>b</sup> | WASH Interventions Alone <sup>c</sup> |
| 2011      | 2.77                                         | 0.11                                          | 1.38                                  | 0.17                                          | 2.43                                  |
| 2012      | 2.71                                         | 0.21                                          | 1.58                                  | 0.33                                          | 2.63                                  |
| 2013      | 2.68                                         | 0.30                                          | 1.68                                  | 0.49                                          | 2.86                                  |
| 2014      | 2.63                                         | 0.40                                          | 1.75                                  | 0.65                                          | 3.04                                  |
| 2015      | 2.57                                         | 0.49                                          | 1.78                                  | 0.80                                          | 3.24                                  |
| 2011–2015 | NA                                           | 1.52                                          | 8.18                                  | 2.47                                          | 14.23                                 |

<sup>a</sup>Assumes maintaining 2010 coverage levels through 2015.

<sup>b</sup>Interventions include vitamin A, rotavirus vaccine, and breastfeeding for prevention and ORS, zinc, and antibiotics for dysentery for treatment of diarrhea.

<sup>c</sup>Interventions include hand-washing, improved sanitation, access to safe water, and home purification of water.

NA, not available.

doi:10.1371/journal.pmed.1000428.t003

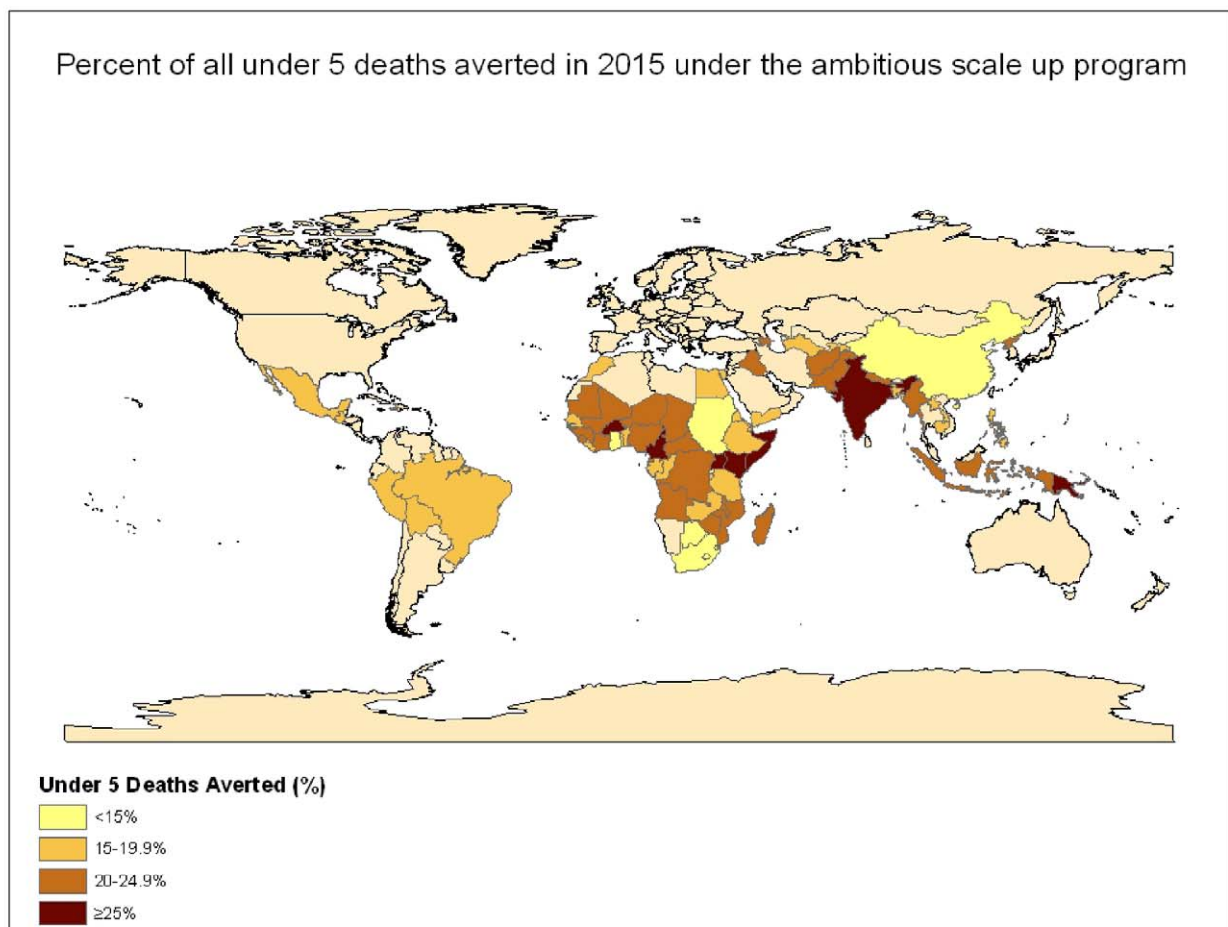

**Figure 2.** Number of child deaths averted in 2015 under the universal scale-up program for the 68 countries included in the analysis.

doi:10.1371/journal.pmed.1000428.g002

missing for many countries. Thus, as coverage data improve, estimates generated by *LiST* will continue to improve.

In this exercise we did not account for the fact that a proportion of children will have access to all interventions, while a proportion of children representing those hardest to reach will likely receive few, if any, of the interventions [23]. The *LiST* tool assumes linearity between coverage of the intervention and the lives saved. Though we recognize that this may not be an accurate portrayal of what happens as coverage increases within a community, we do not currently have the evidence to support an alternative such as a threshold effect, minimum coverage, or herd immunity for these interventions. Ensuring that these lifesaving diarrhea prevention and treatment interventions reach the poorest and most vulnerable populations will be crucial for achievement of equity and maximum impact when scaling up programs if the predicted mortality reductions are to be achieved. For this model, the baseline scenario assumes current coverage values would remain the same through 2015 and thus diarrhea mortality rates would also remain constant. We recognize that there might be some small change in diarrhea mortality as a result of improved economic conditions, and other factors within a community which could also impact diarrhea mortality and are not captured here, but we believe these changes would be relatively small over the short time period captured in this exercise. This limitation could thus be more problematic over a longer time period where the magnitude of these societal changes could be expected to be much greater.

In this analysis, we estimated the cost of scaling up selected interventions in 68 countries. At an additional cost of US\$0.80 per person per year, we can achieve nearly universal coverage of many key diarrhea prevention and treatment interventions. With additional investments in water and sanitation by households and the public sector we could ensure nearly every young child has access to safe water. We did not calculate costs per life saved because this analysis presents only the diarrheal deaths averted and thus fails to capture the full impact. Many of the diarrhea interventions avert deaths from other causes, either directly through prevention of pneumonia (e.g. breastfeeding) or indirectly via a reduction in diarrhea incidence (e.g. hygiene promotion) and stunting and thus the diarrheal deaths averted, which are presented here, likely underestimate the total deaths averted when scaling up this package of interventions.

It was beyond the scope of this analysis and costing exercise to fully estimate the costs required to adequately strengthen the health system in 68 diverse countries to sustainably maintain these high coverage levels. Furthermore, evidence suggests that cost curves are complex and nonlinear for infrastructure, commodities management, transportation, performance monitoring, and supervision [24]. We recognize that ensuring coverage in geographically or socially underserved communities may require strategies or delivery channels that are more costly than those needed to reach more accessible populations and, thus, generalizing per capita expenses where both disease burden and access to the health system vary has its limitations [25,26]. Additional studies to explore variations in costing strategies are needed and may produce results that are more tailored to specific countries and populations.

To ensure the high coverage rates proposed here are achievable, new resources are needed to strengthen health systems for delivery of services, and to support the introduction and scale-up of recently introduced interventions for diarrhea treatment (low osmolality ORS and zinc) and prevention (rotavirus vaccine) [27]. It is recognized that intense promotion of ORS use at the

community level, and training of health workers during the WHO program for the control of diarrheal disease in the 1980s, was successful in scaling up coverage and reducing diarrheal deaths, although progress stagnated during the 1990s [3,28]. There is evidence that promotion of zinc for diarrhea treatment alongside ORS can increase uptake and use, reduce unnecessary antibiotic use, and reinvigorate community management of diarrhea [29,30]. However, there are a number of potential obstacles related to financing, national policy formulation, training, service delivery, and demand creation that are currently limiting scale-up of these strategies and that require urgent attention.

Real progress can be made if the prevention and treatment of diarrhea becomes an international priority and the global health community commits to a number of key actions as laid out in the 2009 UNICEF and WHO report [3]: mobilizing dedicated and sufficient funding for diarrhea control; leveraging global partnerships and networks for strong and effective advocacy; establishing clear and targeted health promotion and behavior change communication strategies; expanding the reach of health services into communities to ensure that diarrhea prevention and treatment is a central component of a “revitalized” community-based primary health care approach; and undertaking complementary efforts across both public and private sectors to promote innovations in supply and delivery of these key interventions to reach high and equitable coverage. In addition, because increasing coverage of these interventions requires input and leadership from multiple sectors and ministries within government, coordination will be critical to ensure success. If the bottlenecks can be overcome and the international community can collectively deliver on the key actions noted above, then child morbidity and mortality due to diarrhea can be dramatically reduced and contribute to the achievement of MDG4. These analyses remind us that reaching goals in reducing under-five mortality does not require the development of new technologies or interventions; rather, these can be reached by implementing existing low cost and effective interventions.

## Supporting Information

**Table S1** Web appendix.

Found at: doi:10.1371/journal.pmed.1000428.s001 (0.04 MB XLSX)

## Acknowledgments

We thank Laura Lamberti for her assistance in creating the tables and figures for this article. The authors also thank Rolf Luyendijk for calculating the yearly estimates of water and sanitation intervention coverage based on JMP data and Mandana Arabi, Christiane Rudert, Clarissa Brockelhurst, Therese Dooley, and Paul Edwards for their assistance with coverage targets for both scale-up scenarios. We also thank Tom O’Connell for his technical assistance and advice with regard to costing strategies.

## Author Contributions

ICMJE criteria for authorship read and met: CLFW IKF NB MY NW OF EW AG REB. Agree with the manuscript’s results and conclusions: CLFW IKF NB MY NW OF EW AG REB. Designed the experiments/the study: CLFW NB MY NW REB. Analyzed the data: CLFW IKF MY EW AG. Collected data/did experiments for the study: IKF NB. Wrote the first draft of the paper: CLFW. Contributed to the writing of the paper: IKF NB MY NW OF EW AG REB. Helped develop the model: NW. Did cost calculations: EW.



## References

- Black RE, Cousens S, Johnson HL, Lawn JE, Rudan I, et al. (2010) Global, regional, and national causes of child mortality in 2008: a systematic analysis. *Lancet* 375: 1969–1987.
- Snyder JD, Merson MH (1982) The magnitude of the global problem of acute diarrhoeal disease: a review of active surveillance data. *Bull World Health Organ* 60: 605–613.
- UNICEF, WHO (2009) Diarrhoea: why children are still dying and what can be done. Geneva: WHO.
- Stover J, McKinnon R, Winfrey B (2010) Spectrum: a model platform for linking of maternal and child survival interventions with AIDS, family planning and demographic projections. *Int J Epi* 39: i7–i10.
- UNICEF (2008) Tracking progress in maternal, newborn and child survival. New York: UNICEF.
- Walker N, Fischer Walker CL, Bryce JL, Bahl R, Cousens S (2010) Standards for CHERG Reviews of Intervention Effects on Child Survival. *Int J Epi* 39: i21–i31.
- Cairncross S, Hunt C, Boisson S, Bostoen K, Curtis V, et al. (2010) Water, sanitation, and hygiene for the prevention of diarrhoea. *Int J Epi* 39: i193–i205.
- Fischer Walker CL, Black RE (2010) Zinc for the treatment of diarrhoea: effect on diarrhoea morbidity, mortality and incidence of future episodes. *Int J Epi* 39: i63–i69.
- Munos MK, Fischer Walker CL, Black RE (2010) The effect of oral rehydration solution and recommended home fluids on diarrhoea mortality. *Int J Epi* 39: i75–i87.
- Munos MK, Fischer Walker CL, Black RE (2010) The effect of rotavirus vaccine on diarrhoea mortality. *Int J Epi* 39: i56–i62.
- Traa BS, Fischer Walker CL, Munos M, Black RE (2010) Antibiotics for the treatment of dysentery in children. *Int J Epi* 39: i70–i74.
- Bhutta ZA, Ahmed T, Black RE, Cousens S, Dewey K, et al. (2008) What works? Interventions for maternal and child undernutrition and survival. *Lancet* 371: 417–440.
- Black RE, Allen LH, Bhutta ZA, Caulfield LE, de Onis M, et al. (2008) Maternal and child undernutrition: global and regional exposures and health consequences. *Lancet* 371: 243–460.
- Friberg IK, Bhutta ZA, Darmstadt GL, Bang A, Cousens S, et al. (2010) Neonatal: comparing modelled predictions of neonatal mortality impacts using LiST with observed results of community-based intervention trials in South Asia. *Int J Epi* 39: i11–i20.
- Hazel E, Gilroy K, Friberg I, Black RE, Bryce J, et al. (2010) ACS-D: Comparing the modeled to the measured mortality reduction: applying the Lives Saved Tool to evaluate data from the Accelerated Child Survival Project in West Africa. *Int J Epi* 39: i32–i39.
- Bryce J, Boschi-Pinto C, Shibuya K (2005) WHO estimates of the causes of death in children. *Lancet* 365: 1147–1152.
- Interagency Group for Child Mortality Estimation (2009) Child mortality estimation. Available: <http://www.childmortality.org/cmeMain.html>. Accessed 31 December 2009.
- World Health Organization (2010) Progress on sanitation and drinking water: 2010 update. Geneva: WHO.
- WHO (2010) WHO/UNICEF estimates of national immunization coverage. Available: [http://www.who.int/immunization\\_monitoring/routine/immunization\\_coverage/en/index4.html](http://www.who.int/immunization_monitoring/routine/immunization_coverage/en/index4.html). Accessed 19 March 2010.
- Waddington H, Snilstveit B, White H, Fewtrell L (2009) Water, sanitation, and hygiene interventions to combat childhood diarrhoea in developing countries in International Initiative for Impact Evaluation. 3rd edition. London: Initiative for Impact Evaluation.
- UNICEF (2010) Supply catalogue. Available: <http://www.supply.unicef.dk/catalogue/>. Accessed 1 September 2010.
- WHO (2010) Tables of costs and prices used in WHO-CHOICE analysis. Available: <http://www.who.int/choice/costs/en/>. Accessed 1 September 2010.
- Boerma JT, Bryce J, Kinfa Y, Axelson H, Victora CG (2008) Mind the gap: equity and trends in coverage of maternal, newborn, and child health services in 54 Countdown countries. *Lancet* 371: 1259–1267.
- Johns B, Baltussen R (2004) Accounting for the cost of scaling-up health interventions. *Health Econ* 13: 1117–1124.
- Johns B, Torres TT (2005) Costs of scaling up health interventions: a systematic review. *Health Policy Plan* 20: 1–13.
- Guinness L, Kumaranayake L, Hanson K (2007) A cost function for HIV prevention services: is there a 'u' - shape? *Cost Eff Resour Alloc* 5: 13.
- Santosham M, Chandran A, Fitzwater S, Fischer-Walker C, Baqui AH, Black R (2010) Progress and barriers for the control of diarrhoeal disease. *Lancet* 376: 63–67.
- Victora CG, Bryce J, Fontaine O, Monasch R (2000) Reducing deaths from diarrhoea through oral rehydration therapy. *Bull World Health Organ* 78: 1246–1255.
- Baqui AH, Black RE, Arifeen SE, Yunus M, Chakraborty J, et al. (2002) Effect of zinc supplementation started during diarrhoea on morbidity and mortality in Bangladeshi children: community randomised trial. *BMJ* 325: 1059.
- Bhandari N, Mazumder S, Taneja S, Dube B, Agarwal RC, et al. (2008) Effectiveness of zinc supplementation plus oral rehydration salts compared with oral rehydration salts alone as a treatment for acute diarrhoea in a primary care setting: a cluster randomized trial. *Pediatrics* 121: 1279–1285.
- Curtis VA, Danquah LO, Aunger RV (2009) Planned, motivated and habitual hygiene behaviour: an eleven country review. *Health Education Review* 24: 655–673.
- WHO. WHO/UNICEF estimates of national immunization coverage. Available: [http://www.who.int/immunization\\_monitoring/routine/immunization\\_coverage/en/index4.html](http://www.who.int/immunization_monitoring/routine/immunization_coverage/en/index4.html). Accessed 19 March 2010.

## Editors' Summary

**Background.** Diarrhea—passing three or more loose or liquid stools per day—kills about 1.5 million young children every year, mainly in low- and middle-income countries. It is the second leading cause of death in under-5-year olds and causes nearly one in five child deaths. Diarrhea, which can lead to life-threatening dehydration, is a common symptom of gastrointestinal infections. The viruses, bacteria and parasites that cause diarrhea spread through contaminated food or drinking water, and from person-to-person through poor hygiene and inadequate sanitation (unsafe disposal of human excreta). Interventions that prevent diarrhea include improvements in water supplies, sanitation and hygiene, the promotion of breastfeeding, vitamin A supplementation, and vaccination against rotavirus (a major cause of diarrhea). Treatments for diarrhea include oral rehydration salts (ORS), which prevent and treat dehydration, and zinc supplementation, which decreases the severity and duration of diarrhea, and antibiotics for dysentery.

**Why Was This Study Done?** Deaths from diarrhea in young children have declined markedly over the past 30 years. However, if diarrhea deaths are not reduced further, it is unlikely that Millennium Development Goal 4 (MDG4; one of the goals agreed by world leaders in 2000 to reduce poverty)—the reduction of child mortality by two-thirds of the 1990 level by 2015—will be reached. In 2009, UNICEF and the World Health Organization (WHO) proposed a new diarrhea reduction plan. Although the effect of individual interventions in this plan is established, the likely effect of the whole package on diarrhea mortality has not been estimated. Such information would be useful for health policy planning. In this study, the researchers use the Lives Saved Tool (*LiST*) to estimate the potential lives saved by scale-up of diarrhea prevention and treatment interventions in 68 high child mortality countries that together account for 95% of child deaths. *LiST* is a child survival modeling tool that uses country-level under-5 death rates and cause of death profiles to model the effects of changes in health intervention package coverage on deaths among children.

**What Did the Researchers Do and Find?** The researchers calculated 2010 (baseline) coverage values for seven prevention interventions (breastfeeding, vitamin A supplementation, hand washing with soap, improved sanitation, improved water source, better household water treatment, and rotavirus vaccination) and for three treatment interventions (ORS, zinc supplementation, and antibiotics for dysentery) from published data. They then used *LiST* to estimate the effect on diarrhea deaths of scaling up intervention coverage according to two scenarios. The “ambitious” scenario assumed a feasible increase in the

coverage of all interventions from the baseline year to 2015 in 68 countries with high child mortality. The “universal” scenario assumed an increase to near 100% coverage for all the interventions. Diarrhea mortality was reduced by 78% and 92% by 2015 under the ambitious and universal scenarios, respectively. Over the 5 years of the scale-up, the universal scenario averted nearly 5 million deaths. The researchers also estimated that the additional costs in 2015 of personal prevention and treatment interventions would be US\$0.80 per capita with universal coverage; the additional costs for these interventions and all sanitation and water interventions would be US\$3.24 per capita.

**What Do These Findings Mean?** These findings suggest that, with currently available interventions, it should be possible to reduce diarrhea deaths substantially at a reasonable cost. As with all computer models, the accuracy of these findings depends on the data and assumptions fed into the model, which does not, for example, account for the difficulties that may be encountered in scaling up intervention coverage in hard to reach populations. Similarly, the estimated costs associated with the two scenarios do not include the resources required to strengthen health systems in developing countries so that they are able to sustain high coverage levels of diarrhea prevention and treatment interventions. Nevertheless, these findings suggest that child mortality due to diarrhea could be significantly reduced by 2015 provided the international community acts collectively to deliver these interventions. Most importantly, the potential 1.4 million lives saved in that year would bring MDG4 a step closer simply by implementing existing low cost and effective interventions.

**Additional Information.** Please access these Web sites via the online version of this summary at <http://dx.doi.org/10.1371/journal.pmed.1000428>.

- The World Health Organization provides information on diarrhea (in several languages); its 2009 report with UNICEF “Diarrhea: why children are still dying and what can be done”, which includes the WHO/UNICEF treatment and prevention plan, can be downloaded from the Internet
- The children’s charity UNICEF, which protects the rights of children and young people around the world, provides information on water, sanitation, and hygiene, and on diarrhea (in several languages)
- The United Nations Millennium Development Goals provides information on ongoing world efforts to reduce child mortality
- More details on *LiST* are available
